# Supplementary material for: Feeder-free generation and characterization of endocardial and cardiac valve cells from human pluripotent stem cells
Source: PubMed Central journal article supplement — iScience. 2023 Nov 30;27(1):108599. doi: 10.1016/j.isci.2023.108599 (PMC10758960; doi:10.1016/j.isci.2023.108599), 2023-11-30
Supplement: mmc1.pdf [file mmc1.pdf]

iScience, Volume 27

## **Supplemental information**

### **Feeder-free generation and characterization of endocardial and cardiac valve cells from human pluripotent stem cells**

**Clifford Z. Liu, Aditi Prasad, Bharati Jadhav, Yu Liu, Mingxia Gu, Andrew J. Sharp, and Bruce D. Gelb**

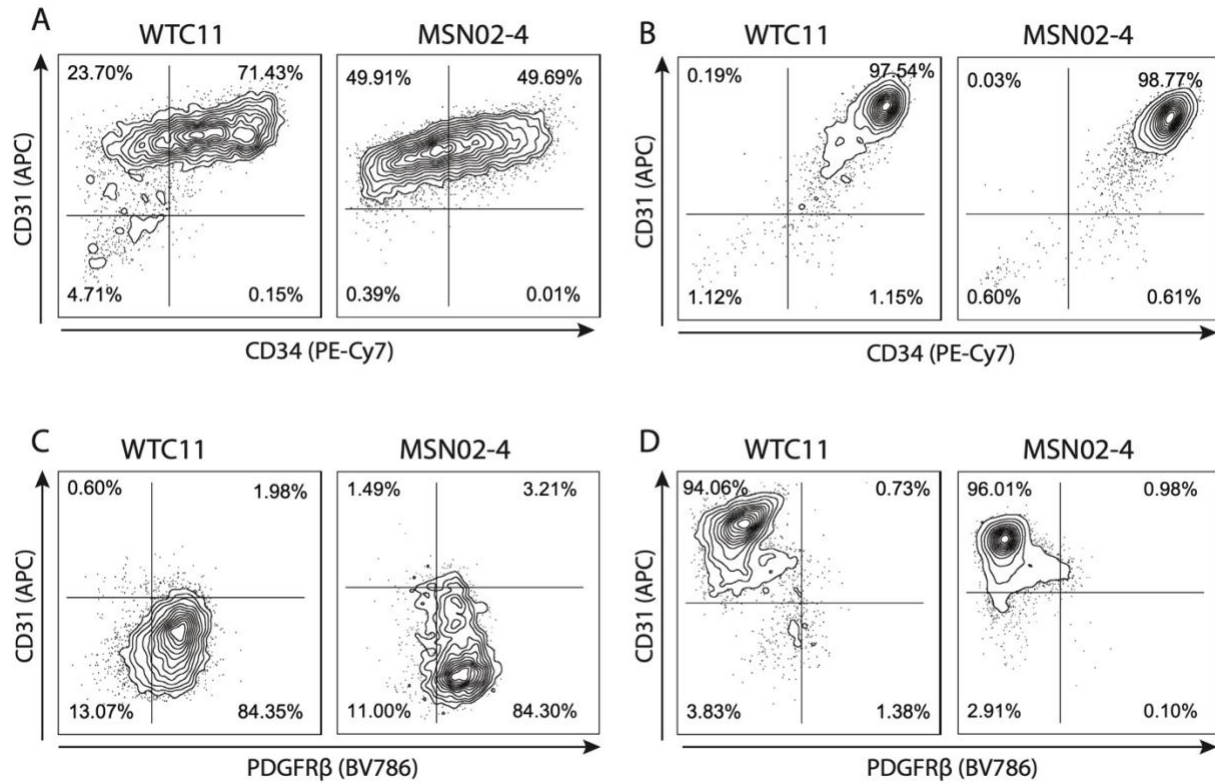

**Figure S1: Validation of sort efficiencies following MACS, related to Figures 1 and 3. (A)**

Sort efficiency following CD31 MACS on Day 14 endocardial cells. **(B)** Sort efficiency

following CD34 MACS on Day 14 endothelial cells. **(C)** Sort efficiency following negative

selection with CD31 MACS for post-EndMT VICs. **(D)** Sort efficiency following positive

selection with CD31 MACS for post-EndMT VECs.

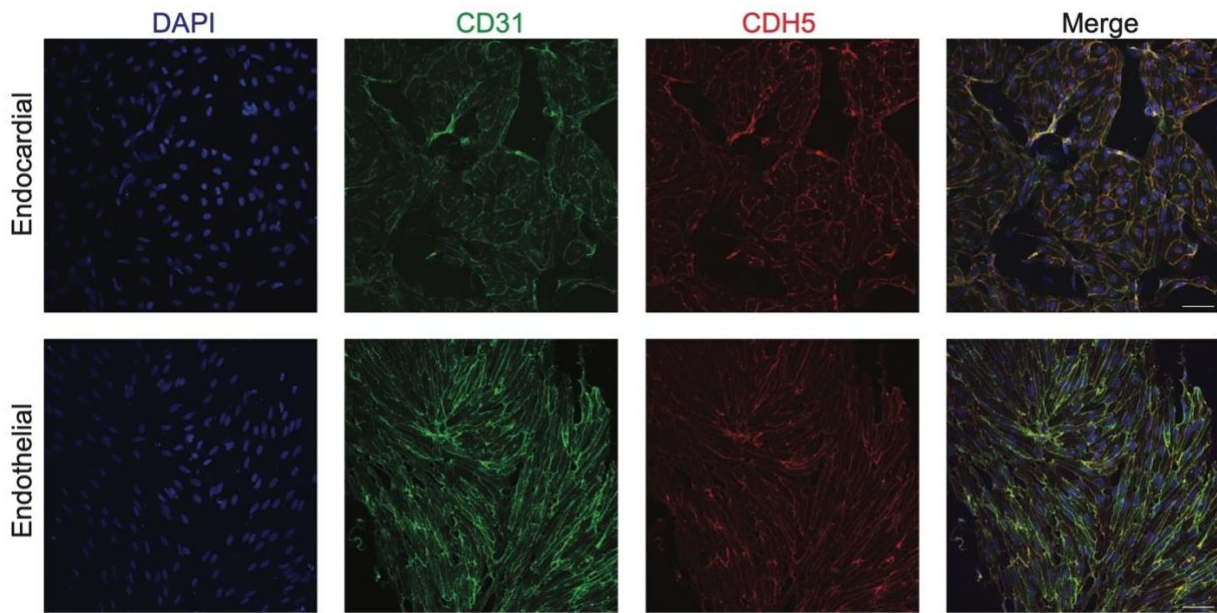

**Figure S2: Immunofluorescence analysis of CD31 and CDH5 of endocardial and endothelial cells, related to Figure 2. Representative confocal microscopy of MSN02-4 endocardial and endothelial cells stained for CD31 (GFP) and CDH5 (RFP).**

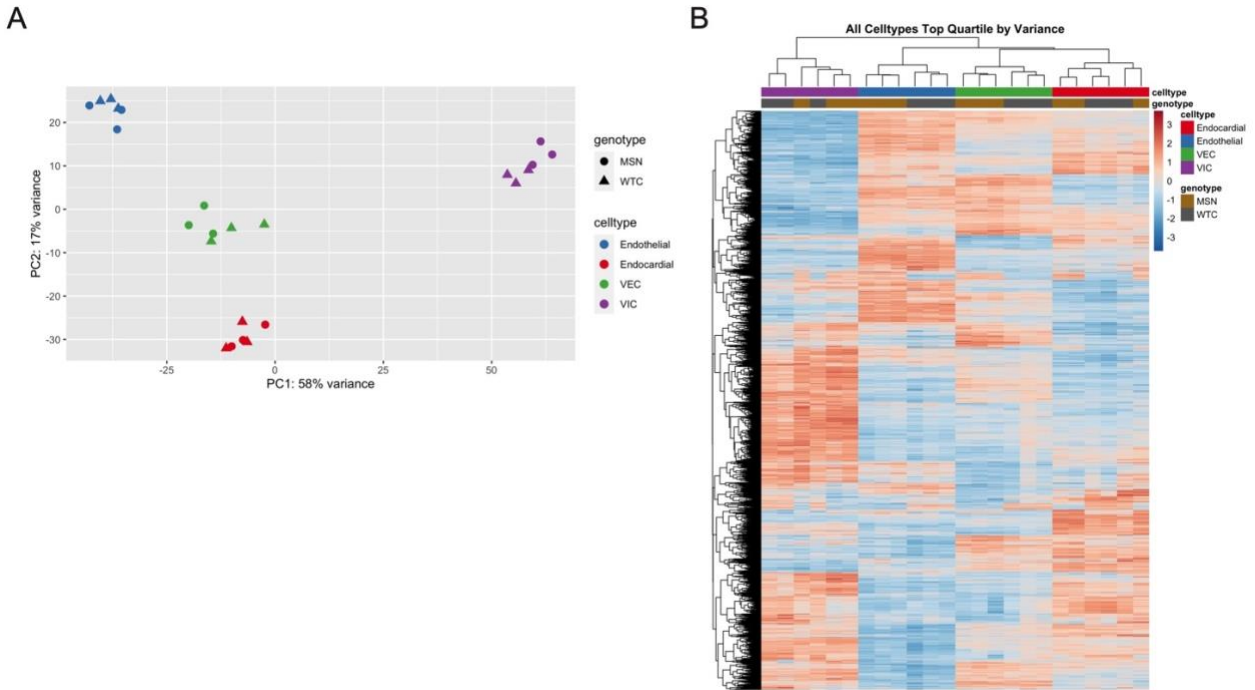

**Figure S3: Bulk-RNaseq analysis on all cell populations, related to Figure 5. (A)** PCA plot of each of the cell populations from both WTC11 and MSN02-4 iPSC lines. **(B)** Heatmap with unsupervised clustering on the top quartile of genes ranked by variance for all cell types.

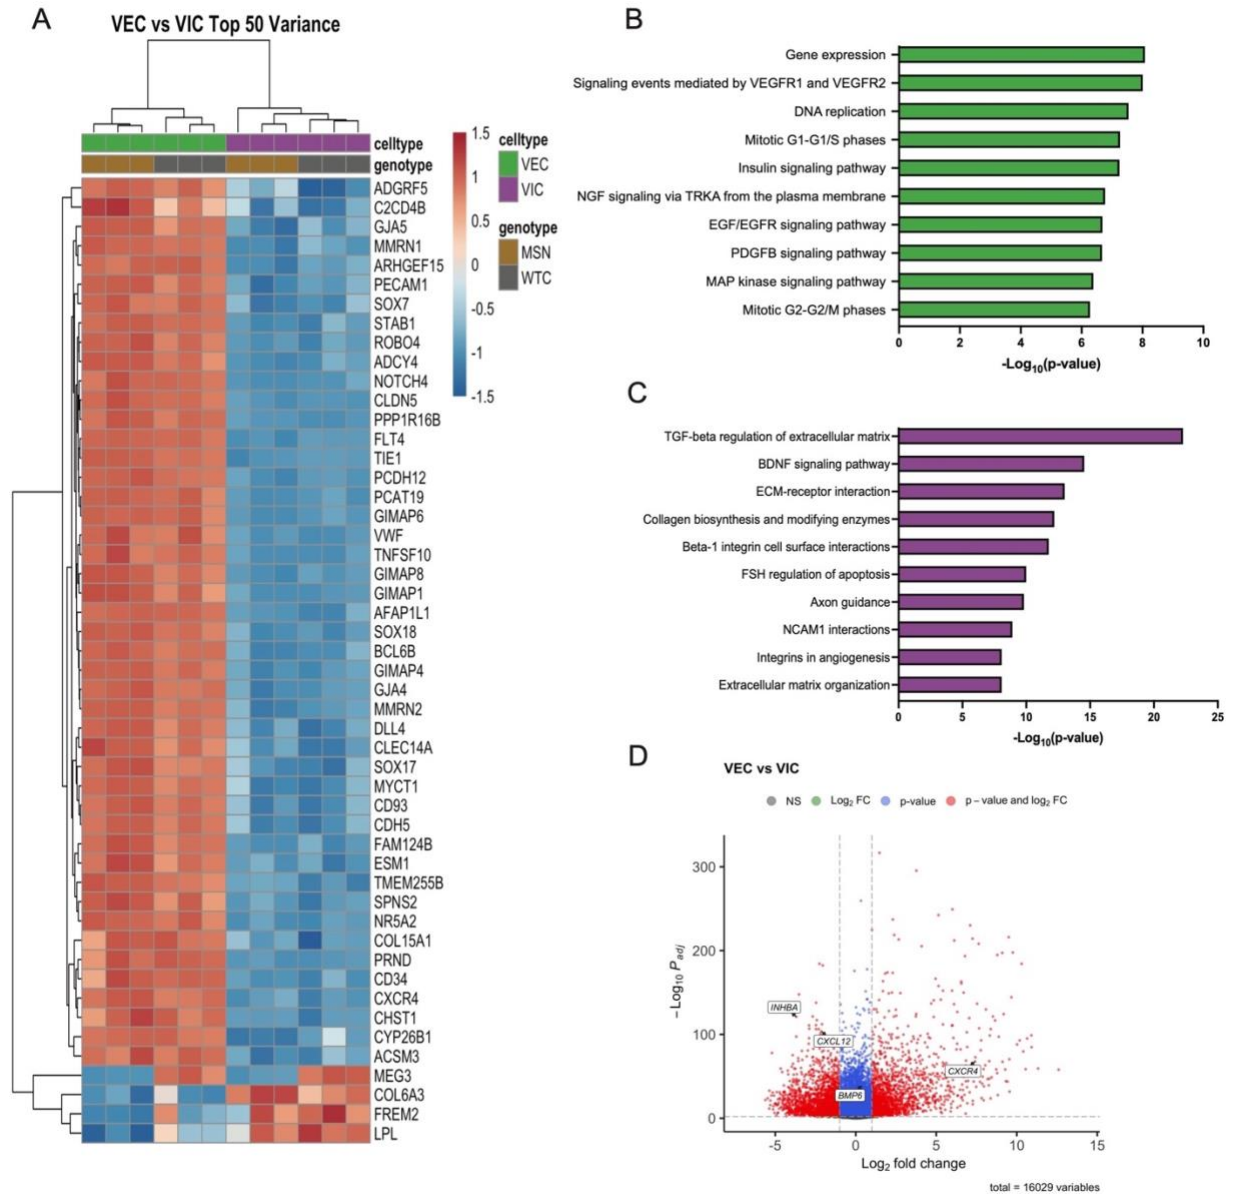

**Figure S4: Bulk-RNAseq characterization of VECs vs VICs, related to Figure 6. (A)**

Heatmap of the top 50 DEGs by variance between VECs and VICs. **(B)** Top 10 BioPlanet GO terms to assess signaling pathway changes for DEGs upregulated in VECs relative to VICs. **(C)** Top 10 BioPlanet GO terms to assess signaling pathway changes for DEGs upregulated in VICs relative to VECs. **(D)** Volcano plot to assess relative expression of *CXCL12*, *INHBA*, *BMP6*, and *CXCR4* between VECs and VICs. Cutoff for  $\log_2$  fold change was set to 1 and -1;  $p_{adj} < 10^{-3}$ .

**Table S1- List of Primers, Related to STAR Methods**

| <b>Gene Name</b> | <b>Forward Primer (5' to 3')</b> | <b>Reverse Primer (5' to 3')</b> |
|------------------|----------------------------------|----------------------------------|
| CAD11            | CCAACAGCCCGATAAGGTATT            | TTGGGAGCATTATCGTTGACA            |
| CD31             | GACGTGCAGTACACGGAAGT             | GGAGCCTTCCGTTCTAGAGTAT           |
| CDH5             | GGCAGTCCAACGGAACAGA              | CTCTCTTTTGGCGCCCGT               |
| COL1A1           | CAATGCTGCCCTTTCTGCTCCTTT         | CACTTGGGTGTTTGTGAGCATTGCCT       |
| COL3A1           | GAATTTGGTGTGGACGTTGG             | CTTGCACTGGTTGACAAGATTAG          |
| GATA4            | CGAATGACGGCATCTGTTTGCCAT         | ATTTGGTATTAGGGATGCAGGGCG         |
| GATA5            | CTCGTACTCCGCCACCTACC             | AGTTGACACACTCACGACCC             |
| HAPLN1           | AGCCACCTGATTAAGAAACCA            | TGACAGAGTTTGACACAAAGAAAA         |
| ISL1             | TCCCTATGTGTTGGTTGCGG             | TCGTTCTTGCTGAAGCCGAT             |
| MEIS2            | AGCGCAAGACACAGGACTTA             | AAACCTGCTCGATTTGACTGG            |
| N-CAD            | ATGTGCATGAAGGACAGCCTCT           | GTGGAAAGCTTCTCACGGCA             |
| NFATc1           | GCATCACAGGGAAGACCGTGTC           | GAAGTTCAATGTCCGAGTTTCTGAG        |
| NKX2.5           | TTTGCATTCCTCCTGCGGAGACCTA        | ACTCATTGCACGCTGCATAATCGC         |
| NPR3             | CGGGAAGATTCCATCAGATCC            | GTCTTTCAACCCGTCTATCTCC           |
| NRG1             | CCGAAAGCCACTCTGTAATC             | CCTGAGGAAGCTGTTACATTC            |
| POSTN            | TGCCCAGCAGTTTTGCCCAT             | CGTTGCTCTCCAAACCTCTA             |
| SOX9             | ACACTCCTCCTCCGGCATGAG            | GCTTCAGGTCAGCCTTGCC              |
| TBP              | TGAGTTGCTCATACCGTGCTGCTA         | CCCTCAAACCAACTTGTCAACAGC         |
| TGFB2            | TCTGTGGGTACCTTGATGCC             | GCGCTGGGTGGAGATGTTA              |
| TMEM100          | TGCTCCTTACTGCATTGGCTT            | GCTTGGTAAGAGGAGCATGGA            |
| VIM              | GGACCAGCTAACCAACGACA             | AAGGTCAAGACGTGCCAGAG             |
